# Supplementary material for: Musculoskeletal disorders as underlying cause of death in 58 countries, 1986–2011: trend analysis of WHO mortality database
Source: Springer Nature journal article supplement (doi:10.1186/s12891-017-1428-1), 2017-02-02
Supplement: MOESM4 [file 12043618]

Age-standardized mortality rate per million person-years

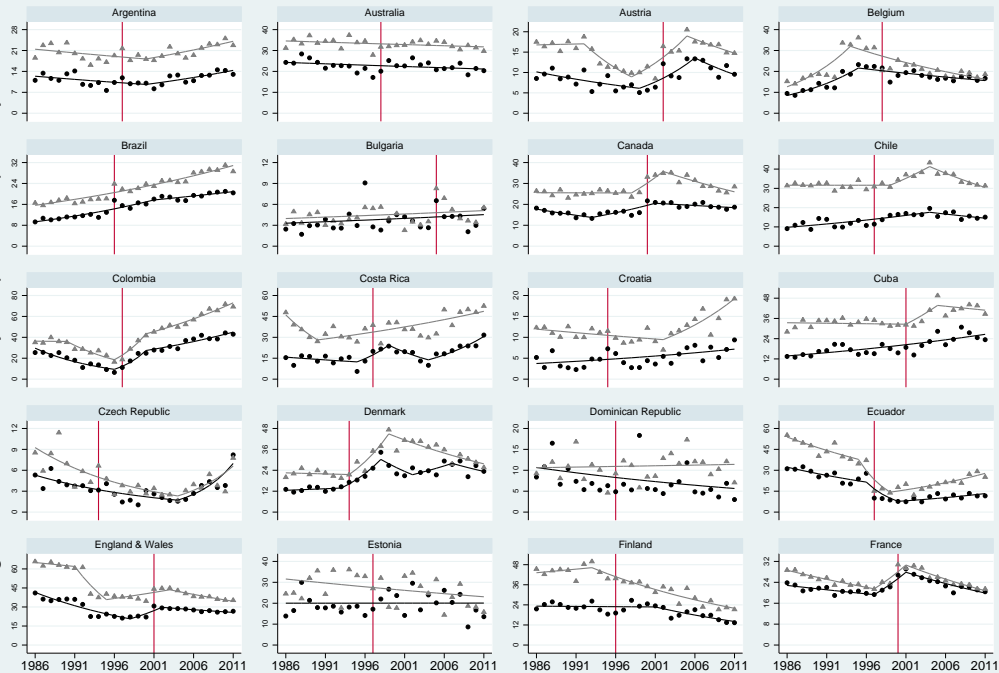

▲ Women  
● Men

Year

Age-standardized mortality rate per million person-years

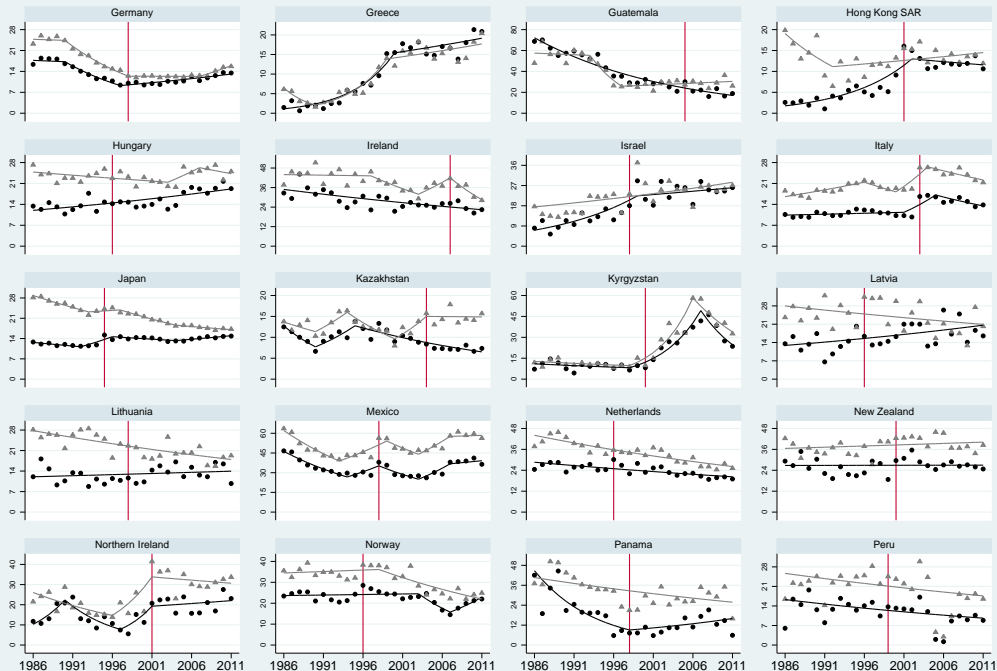

Year

Age-standardized mortality rate per million person-years

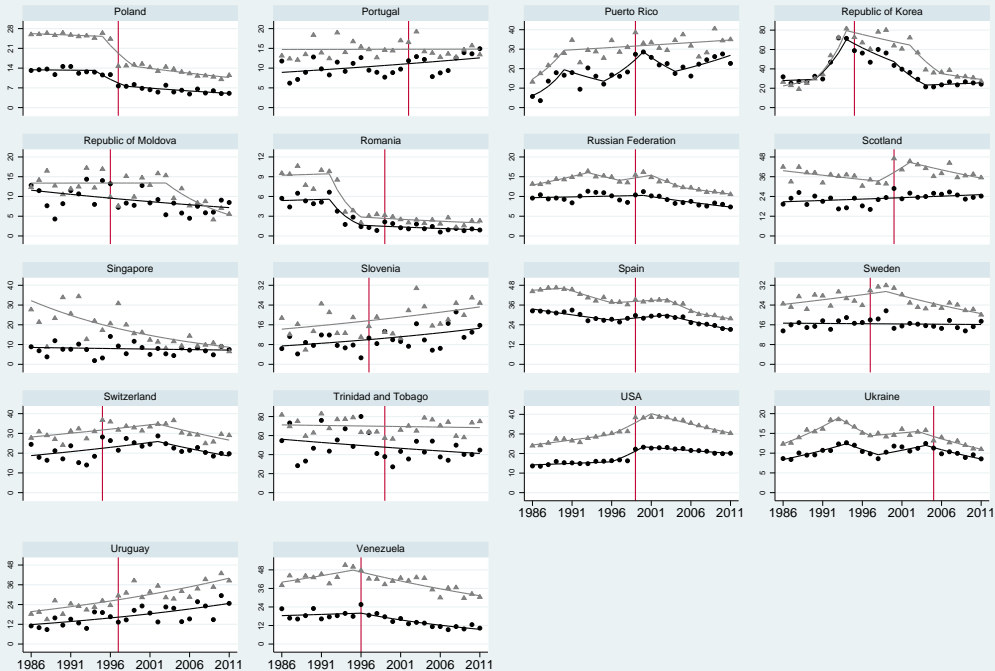

Year
